# Supplementary material
Source: publisher site journal article supplement (https://www.dovepress.com/article/220151)
Supplement: Supplementary file 1 [file get_supplementary_file.php]

**SUPPLEMENTARY MATERIAL**

Table S1 List of participating centers and patient enrollment totals.

| **Site Name** | **Patients Enrolled** |
| --- | --- |
| LKH Graz (Graz, Austria) | 25 |
| ZNA Middleheim (Antwerp, Belgium) | 48 |
| OLVG-location West (formerly: Sint Lucas Andreas Ziekenhuis) (Amsterdam, The Netherlands) | 49 |
| St. Bonifatius Hospital GMbH (Lingen, Germany) | 65 |
| Klinikum Augsburg (Augsburg, Germany) | 20 |
| Charite-Virchow-Klinikum (Berlin, Germany) | 17 |
| University Medical Center Schleswig-Holstein (Kiel, Germany) | 25 |
| OLV Ziekenhuis (Aalst, Belgium) | 60 |
| Universitätsmedizin Mannheim (Mannheim, Germany) | 25 |
| University Hospital Dϋsseldorf (Dϋsseldorf, Germany) | 25 |
| Donauisar Klinikum Deggendorf (Deggendorf, Germany) | 40 |
| Asklepios Westklinikum Hamburg (Hamburg, Germany) | 13 |
| Isala Ziekenhuis (Zwolle, The Netherlands) | 17 |
| Medical University Innsbruck (Innsbruck, Austria) | 25 |
| A.Z Nikolaas Hospital (St. Nikolaas, Belgium) | 5 |
| Haaglansden Medical Center: Antoniushove (Den Haag, The Netherlands) | 19 |
| Haaglanden Medical Center: Westeinde (Den Haag, The Netherlands) | 1 |
| Kantonsspital Aarau (Aarau, Switzerland) | 60 |
| Knappschafts-Krankenhaus Bochum-Langendreer (Bochum, Germany) | 8 |
| Centre Hospitalier Régional Universitaire de Lille (CHRU), Hôpital Roger Salengro (Lille, France) | 2 |
| Orthopädische Klinik und Poliklinik, Universitätsmedizin Rostock (Rostock, Germany) | 5 |
